# Supplementary material
Source: MDPI journal article supplement (https://www.mdpi.com/2624-781X/4/3/27)
Supplement: s1 [file s1]

Article

## One-Pot Synthesis of Stable Poly([c2]Daisy-chain Rotaxane) with Pseudo-stopper via Metathesis Reaction and Thiol-ene Reaction

Risako Kamoto, Kenjiro Onimura and Kazuhiro Yamabuki \*

Graduate School of Sciences and Technology for Innovation, Yamaguchi University, 2-16-1 Tokiwadai, Ube, Yamaguchi 755-8611, Japan; [b014vfv@yamaguchi-u.ac.jp](mailto:b014vfv@yamaguchi-u.ac.jp) (R.K.); [onimura@yamaguchi-u.ac.jp](mailto:onimura@yamaguchi-u.ac.jp) (K.O.)

\* Correspondence: [yamabuki@yamaguchi-u.ac.jp](mailto:yamabuki@yamaguchi-u.ac.jp)

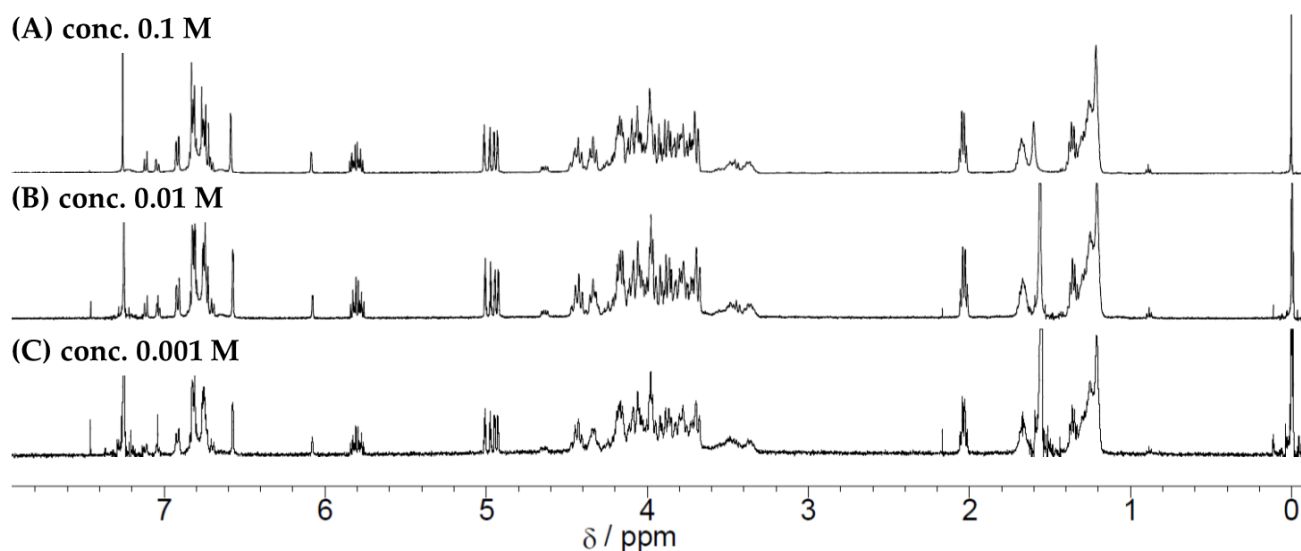

**Figure S1.**  $^1\text{H}$  NMR spectra of H-G monomer at (A) conc. 0.1 M, (B) 0.01, and (C) 0.001 M in  $\text{CDCl}_3$ .

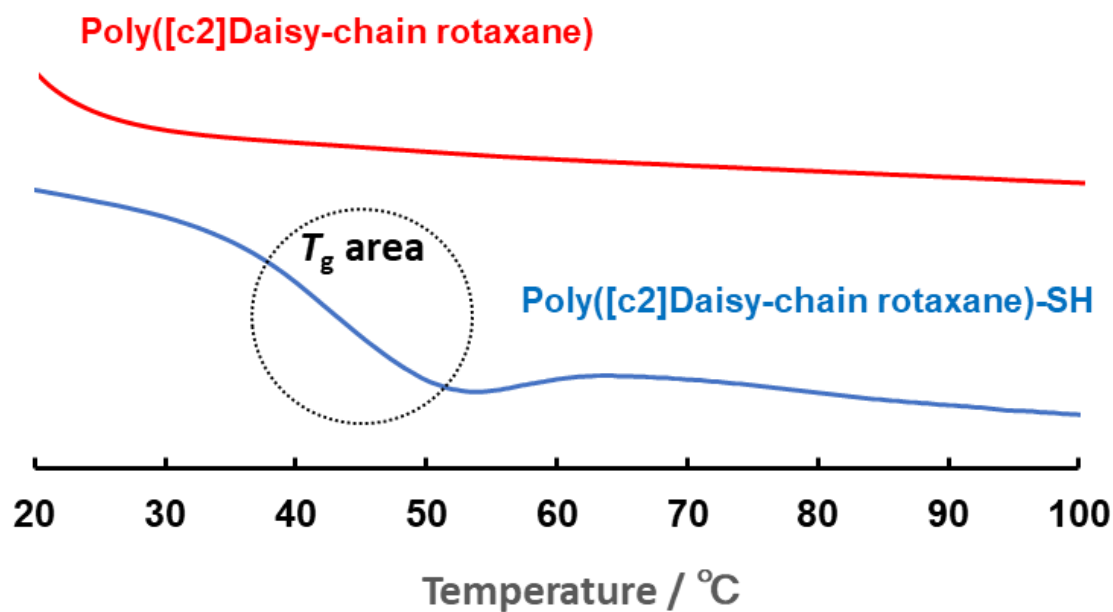

**Figure S2.** DSC charts of poly([c2]daisy-chain rotaxane) (red line) and poly([c2]daisy-chain rotaxane)-SH (blue line).

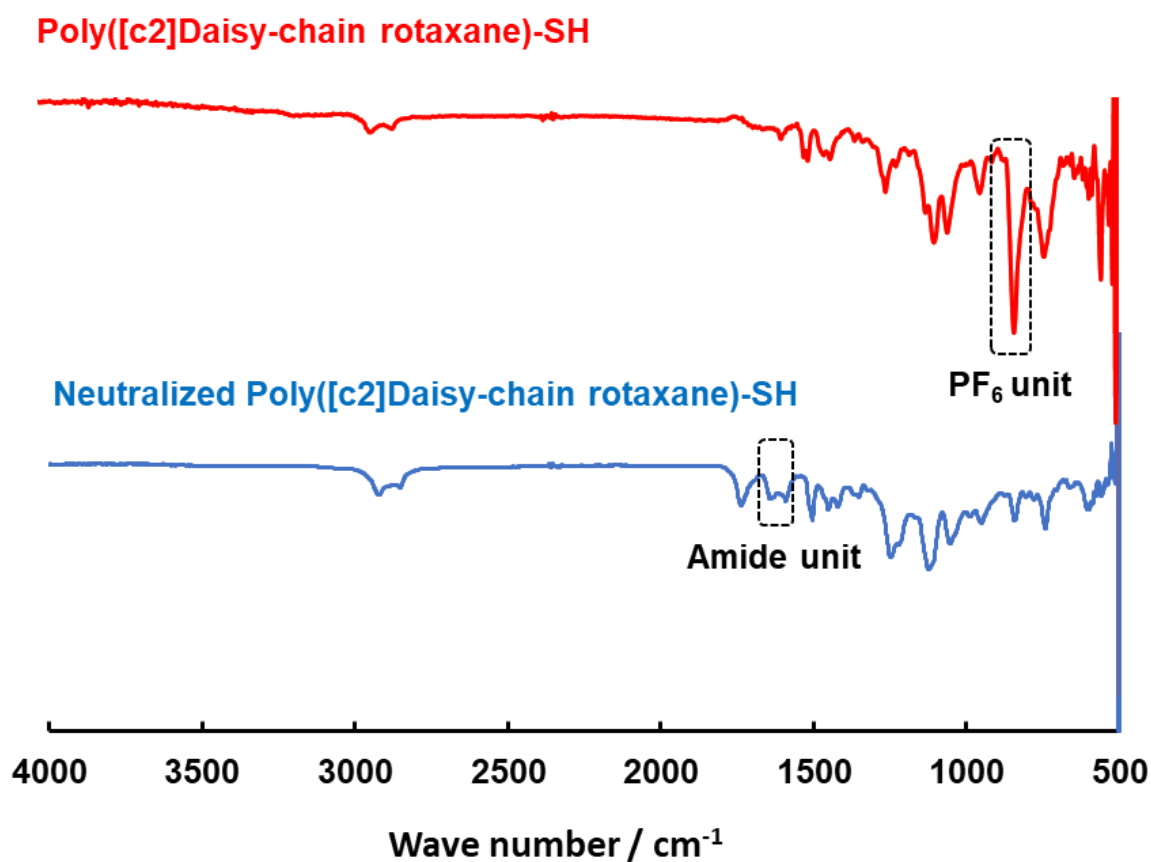

**Figure S3.** IR spectra of poly([c2]daisy-chain rotaxane)-SH (red line) and neutralized poly([c2]daisy-chain rotaxane)-SH (blue line).

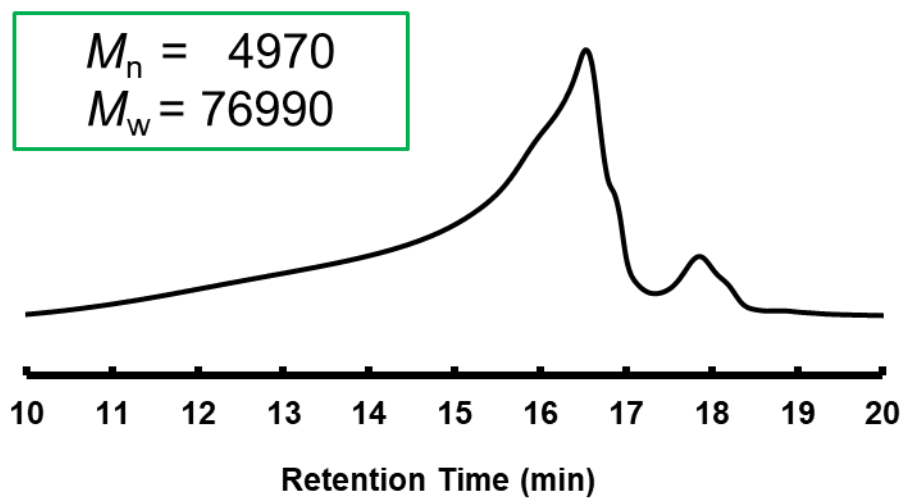

**Figure S4.** GPC chart of neutralized poly([c2]Daisy-chain rotaxane-SH (eluent:  $\text{CHCl}_3$ ).

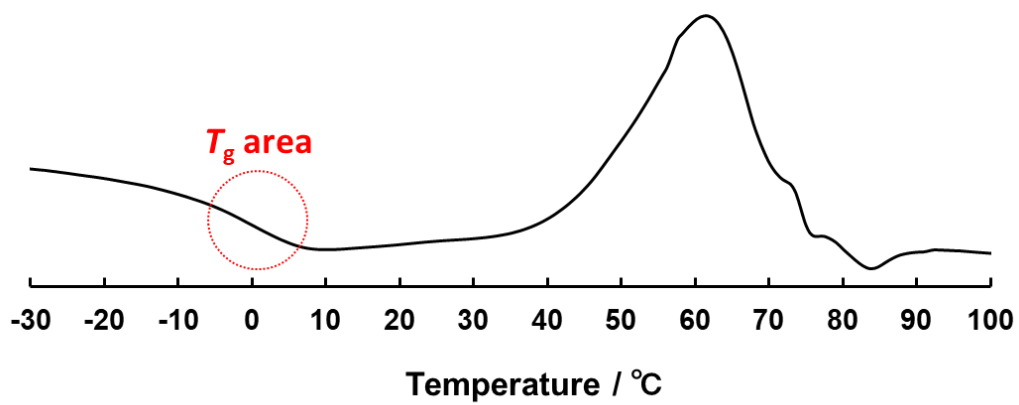

**Figure S5.** DSC charts of neutralized poly([c2]Daisy-chain rotaxane).

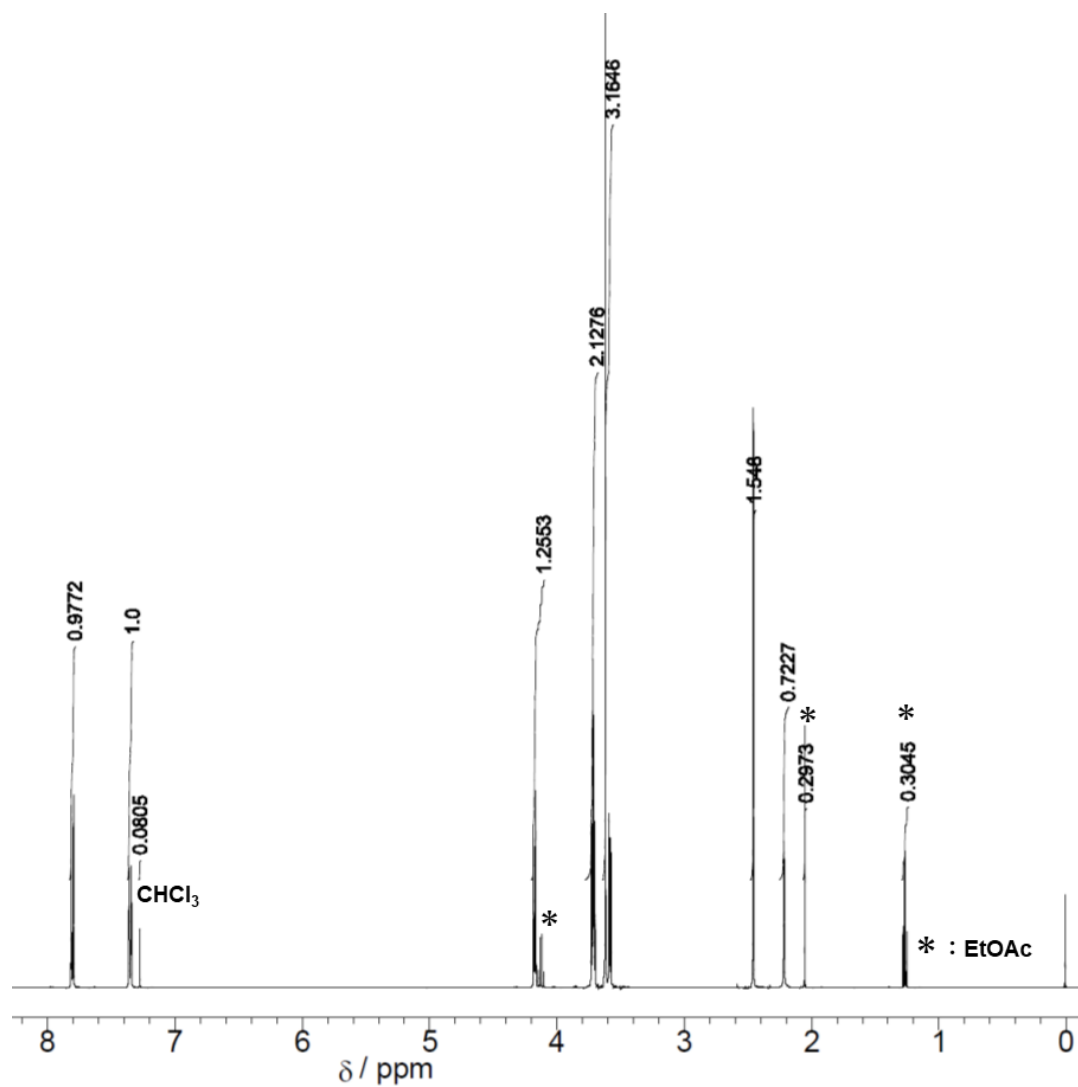

**Figure S6.** <sup>1</sup>H NMR spectra of compound 1 in CDCl<sub>3</sub>.

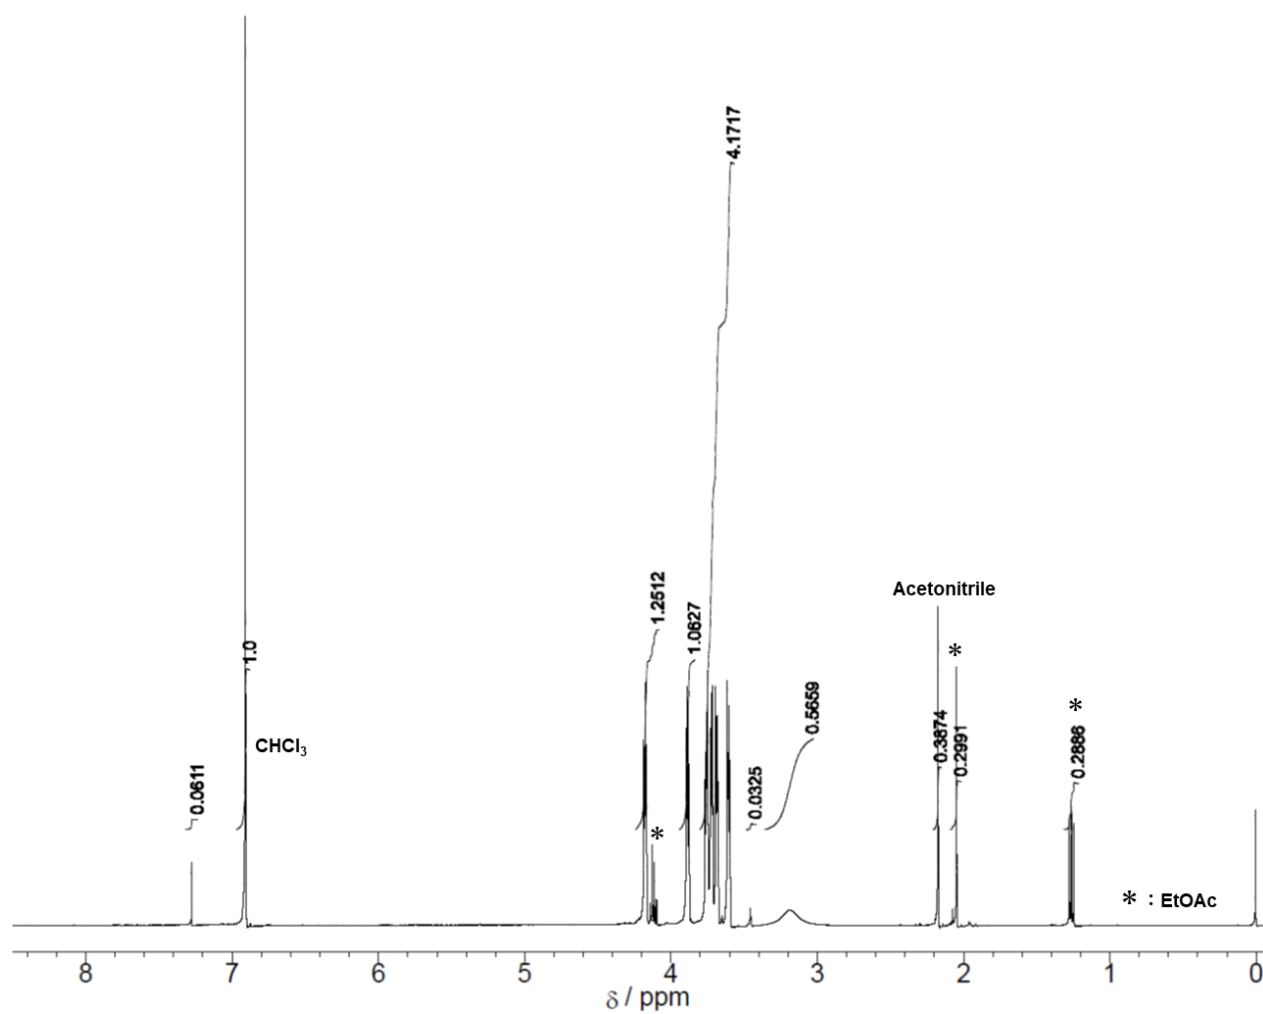

**Figure S7.**  $^1\text{H}$  NMR spectra of compound **2** in  $\text{CDCl}_3$ .

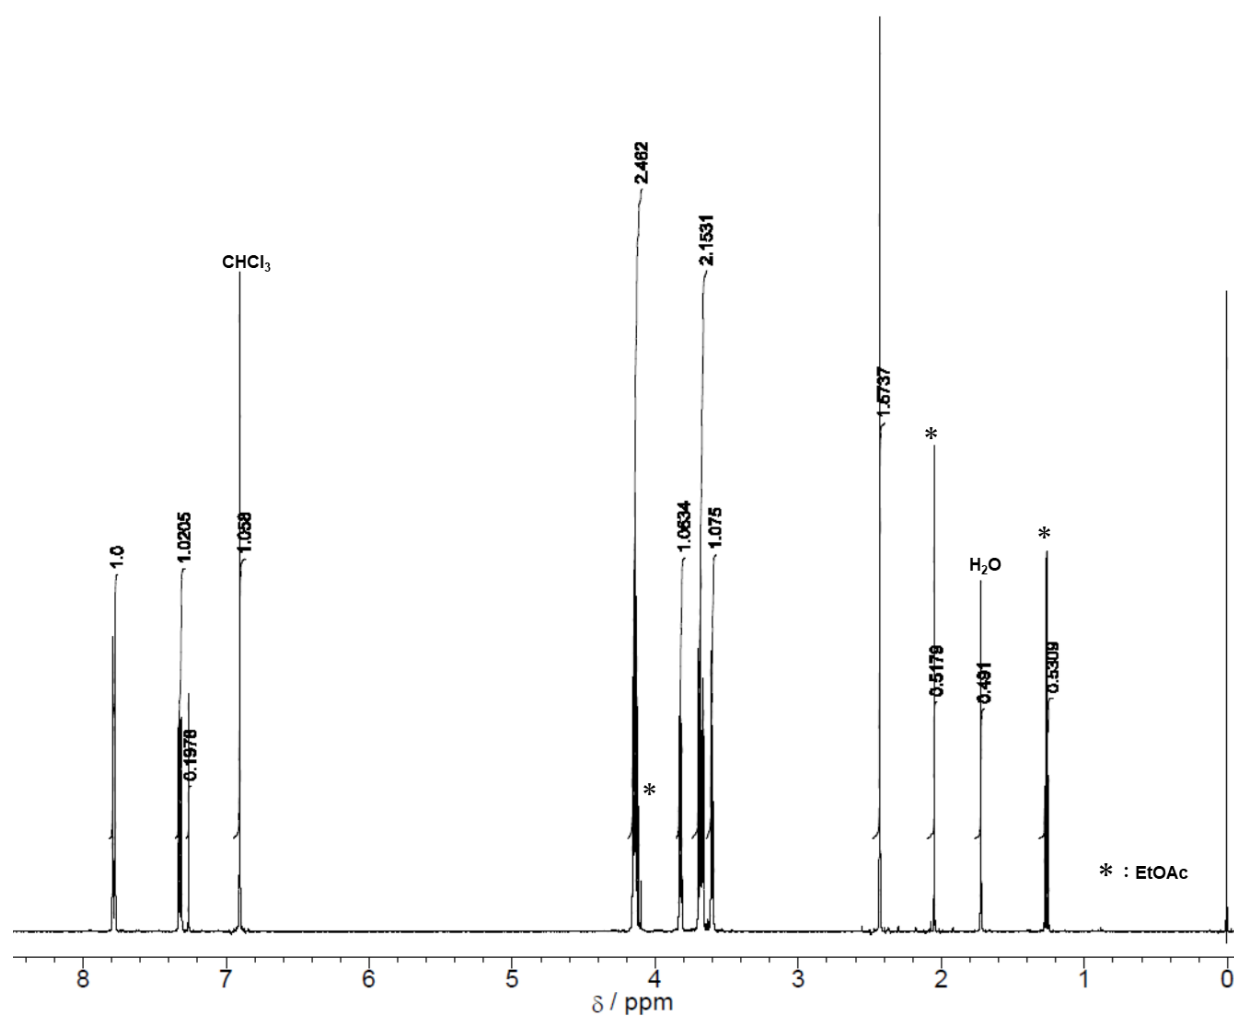

**Figure S8.** <sup>1</sup>H NMR spectra of compound 3 in CDCl<sub>3</sub>.

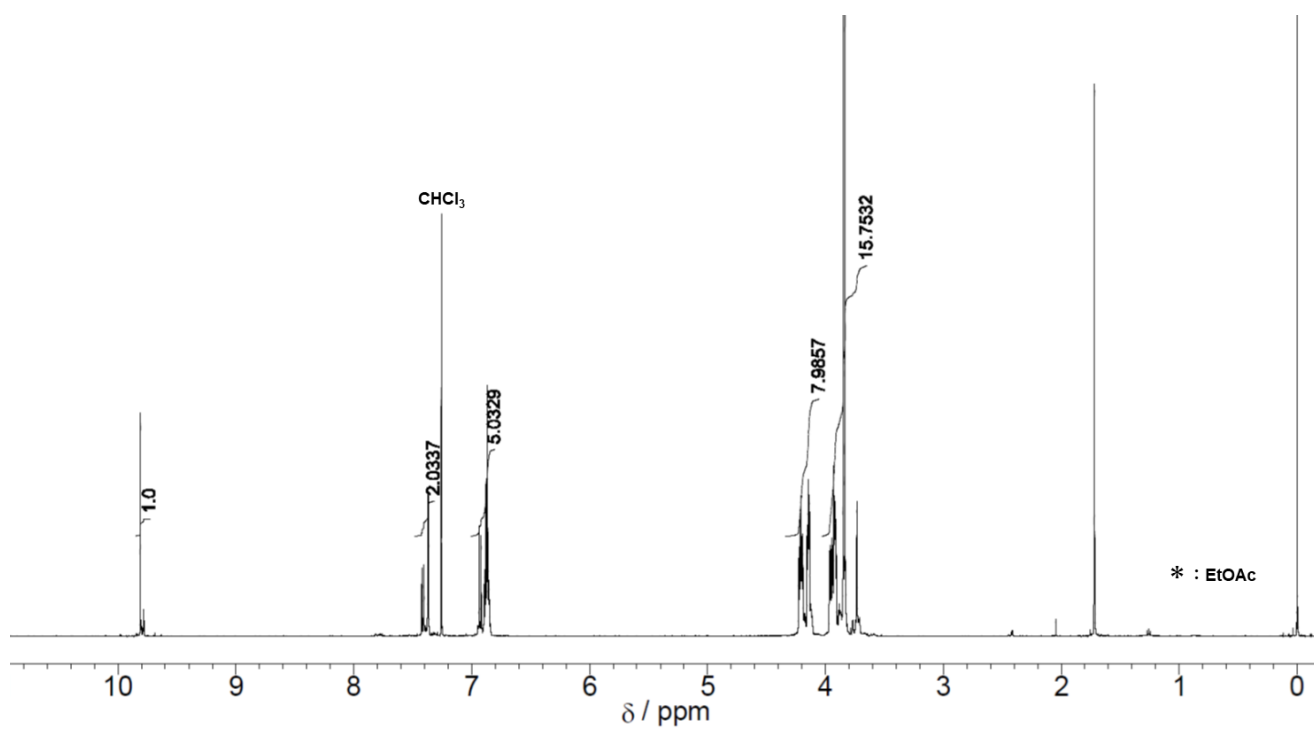

**Figure S9.**  $^1\text{H}$  NMR spectra of compound 4 in  $\text{CDCl}_3$ .

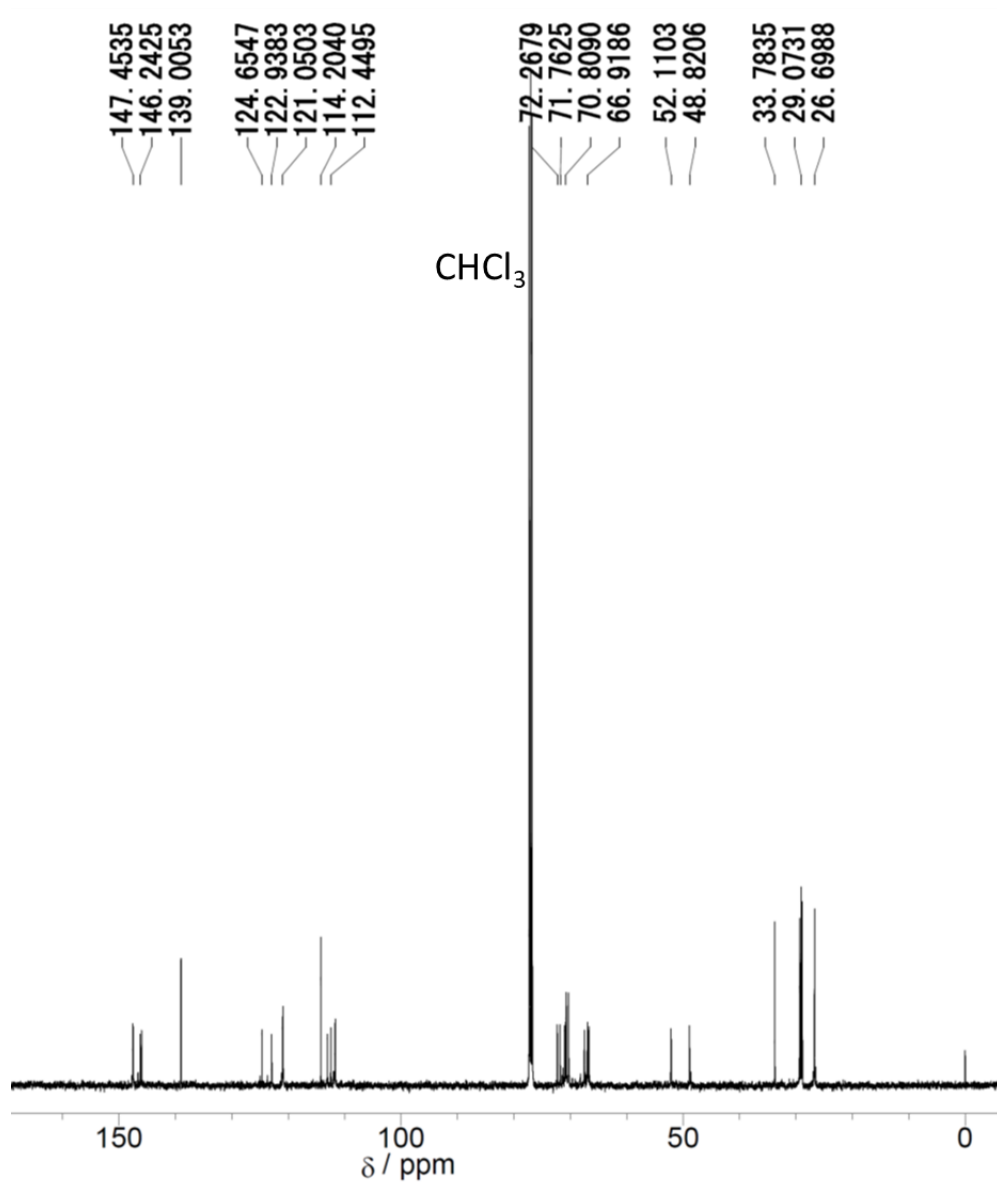

**Figure S10.**  $^{13}\text{C}$  NMR spectra of H-G monomer in  $\text{CDCl}_3$ .
